# Supplementary material
Source: PubMed Central journal article supplement (PMC3203520)
Supplement: NIHMS329570-supplement-1.pdf [file NIHMS329570-supplement-1.pdf]

## SUPPLEMENTAL MATERIAL

### Altered Desmosomal Proteins in Granulomatous Myocarditis and Potential Pathogenic

#### Links to Arrhythmogenic Right Ventricular Cardiomyopathy

Angeliki Asimaki, PhD,<sup>1</sup> Harikrishna Tandri, MD,<sup>2</sup> Elizabeth R. Duffy, MA,<sup>3</sup>  
Jeffrey R. Winterfield, MD,<sup>4</sup> Shannon Mackey-Bojack, MD,<sup>5</sup> Maria M. Picken, MD, PhD,<sup>6</sup>  
Leslie T. Cooper, MD,<sup>7</sup> David J. Wilber, MD,<sup>6</sup> Frank I. Marcus, MD,<sup>8</sup> Cristina Basso, MD,<sup>9</sup>  
Gaetano Thiene, MD,<sup>9</sup> Adalena Tsatsopoulou, MD,<sup>10</sup> Nikos Protonotarios, MD,<sup>10</sup>  
William G. Stevenson, MD,<sup>4</sup> William J. McKenna, MD,<sup>11</sup> Shiva Gautam, PhD,<sup>1</sup> Daniel G. Remick, MD<sup>3</sup>  
Hugh Calkins, MD,<sup>2</sup> Jeffrey E. Saffitz, MD, PhD<sup>1</sup>

<sup>1</sup>Department of Pathology (AA and JES), Department of Medicine (SG) Beth Israel Deaconess  
Medical Center and Harvard Medical School, Boston, MA

<sup>2</sup>Department of Medicine, Johns Hopkins Medical Institutions, Baltimore, MD

<sup>3</sup>Department of Pathology, Boston University Medical Center, Boston, MA

<sup>4</sup>Department of Medicine, Brigham and Women's Hospital and Harvard Medical School, Boston, MA

<sup>5</sup>Jesse E. Edwards Registry of Cardiovascular Diseases, St. Paul, MN

<sup>6</sup>Department of Pathology (MMP), Department of Medicine (DJW),  
Loyola University Health System, Maywood, IL

<sup>7</sup>Department of Cardiovascular Diseases, Mayo Clinic, Rochester, MN

<sup>8</sup>Department of Medicine, University of Arizona, Tucson, AZ

<sup>9</sup>Department of Medico-Diagnostic Sciences and Special Therapies, University of Padua, Padua, IT

<sup>10</sup>Yiannis Protonotarios Medical Center, Naxos, Greece

<sup>11</sup>The Heart Hospital, University College London, London, UK

#### Address correspondence to:

Jeffrey E. Saffitz, MD, PhD  
Department of Pathology  
Beth Israel Deaconess Medical Center  
330 Brookline Ave  
Boston, MA 02215  
Phone: 617-667-4343  
Fax: 617-667-2943  
[jsaffitz@bidmc.harvard.edu](mailto:jsaffitz@bidmc.harvard.edu)

**Supplemental Table 1. Sarcoidosis patients**

| Patient Number | Sex | Age | Clinical/Pathological Features                                                      | Junctional Immunoreactive Signal Intensity |             |           |             |           |
|----------------|-----|-----|-------------------------------------------------------------------------------------|--------------------------------------------|-------------|-----------|-------------|-----------|
|                |     |     |                                                                                     | N-cadherin                                 | Plakoglobin | Cx43      | desmoplakin | PKP2      |
| 1              | F   | 46  | Palpitations, syncope, multiple VT morphologies, mild RV dilatation; sarcoid on EMB | normal                                     | decreased   | decreased |             |           |
| 2              | M   | 35  | QRS prolongation, T wave inversions, RV dilatation, HF; sarcoid at transplantation  | normal                                     | decreased   | decreased | decreased   | decreased |
| 3              | M   | 51  | ECG and echo consistent with ARVC, multiple VT morphologies; sarcoid on EMB         | normal                                     | decreased   | normal    |             |           |
| 4              | M   | 45  | ECG and echo consistent with ARVC, multiple VT morphologies; sarcoid on EMB         | normal                                     | decreased   | normal    |             |           |
| 5              | M   | 54  | Initial diagnosis DCM; sarcoid at transplantation                                   | normal                                     | decreased   | normal    |             |           |
| 6              | M   | 44  | Sarcoid on EMB                                                                      | normal                                     | decreased   | normal    |             |           |
| 7              | F   | 52  | Sarcoid on EMB                                                                      | normal                                     | decreased   | normal    |             |           |
| 8              | M   | 54  | Sarcoid on EMB                                                                      | normal                                     | decreased   | decreased |             |           |
| 9              | M   | 86  | CAD, CABG, AF, cardiac arrest at catheterization; sarcoid at autopsy                | normal                                     | normal      | normal    |             |           |
| 10             | M   | 21  | Initial diagnosis DCM; ICD, SCD; sarcoid at autopsy                                 | normal                                     | decreased   | decreased |             |           |
| 11             | M   | 67  | HF, COPD; sarcoid at autopsy                                                        | normal                                     | decreased   | decreased | decreased   | decreased |
| 12             | F   | 43  | Syncope, SCD; sarcoid at autopsy                                                    | normal                                     | decreased   | decreased | decreased   | decreased |
| 13             | F   | 78  | HF, COPD, hypothyroidism; sarcoid at autopsy                                        | normal                                     | decreased   | normal    |             |           |
| 14             | F   | 39  | SCD; sarcoid at autopsy                                                             | normal                                     | decreased   | decreased | decreased   | decreased |
| 15             | F   | 42  | Eosinophilic myocarditis diagnosed on EMB, SCD; sarcoid at autopsy                  | normal                                     | decreased   | normal    |             |           |
| 16             | M   | 37  | SCD; sarcoid at autopsy                                                             | normal                                     | decreased   | decreased | normal      | normal    |
| 17             | M   | 40  | Syncope, 1st degree AV block, SCD; sarcoid at autopsy                               | normal                                     | decreased   | normal    | decreased   | decreased |
| 18             | M   | 44  | SCD; sarcoid at autopsy                                                             | normal                                     | normal      | normal    |             |           |
| 19             | M   | N/A | SCD; sarcoid at autopsy                                                             | normal                                     | decreased   | normal    | normal      | normal    |
| 20             | M   | 25  | SCD; sarcoid at autopsy                                                             | normal                                     | decreased   | decreased | decreased   | decreased |
| 21             | M   | 64  | LV enlargement, inferobasal and septal fibrosis on MRI, VT; sarcoid on EMB          | normal                                     | decreased   | decreased |             |           |
| 22             | M   | 34  | Basal septal and lateral fibrosis on MRI, VT; sarcoid on EMB                        | normal                                     | decreased   | normal    |             |           |
| 23             | M   | 60  | Basal septal and lateral fibrosis on MRI, complete heart block, VT; sarcoid on EMB  | normal                                     | decreased   | decreased |             |           |

**Abbreviations:** VT, ventricular tachycardia; RV, right ventricular; EMB, endomyocardial biopsy; HF, heart failure; ECG, electrocardiogram; ARVC, arrhythmogenic right ventricular cardiomyopathy; DCM, dilated cardiomyopathy; CAD, coronary artery disease; CABG, coronary artery bypass grafting; SCD, sudden cardiac death; AF, atrial fibrillation; ICD, implanted cardiac defibrillator; COPD, chronic obstructive pulmonary disease; AV, atrioventricular; MRI, magnetic resonance imaging

## Supplemental Table 2. Giant cell myocarditis patients

| Patient Number | Sex | Age | Clinical Characteristics                                                            | Junctional Immunoreactive Signal Intensity |             |           |             |           |
|----------------|-----|-----|-------------------------------------------------------------------------------------|--------------------------------------------|-------------|-----------|-------------|-----------|
|                |     |     |                                                                                     | N-cadherin                                 | Plakoglobin | Cx43      | desmoplakin | PKP2      |
| 1              | M   | 57  | Psoriasis, myositis, HF, AF, cardiogenic shock; GCM at autopsy                      | normal                                     | decreased   | normal    | normal      | normal    |
| 2              | M   | 49  | Biventricular dilatation, low EF; GCM at autopsy                                    | normal                                     | decreased   | normal    | normal      | normal    |
| 3              | F   | 34  | EF 19%, normal CA; GCM at autopsy                                                   | normal                                     | decreased   | decreased | decreased   | decreased |
| 4              | M   | 24  | Acute febrile illness, maculopapular rash, cervical lymphadenopathy; GCM at autopsy | normal                                     | decreased   | decreased | decreased   | decreased |
| 5              | N/A | N/A | GCM at autopsy                                                                      | normal                                     | decreased   | normal    | decreased   | decreased |
| 6              | F   | 47  | Chest pain, dypnea, syncope, VT, resuscitated cardiac arrest; GCM on EMB            | normal                                     | decreased   | decreased |             |           |
| 7              | F   | 44  | Hives, eosinophilia, jaundice, low EF, T wave inversions, PVCs; GCM on EMB          | normal                                     | decreased   | decreased |             |           |
| 8              | M   | 42  | VT, EF 35%; GCM at autopsy                                                          | normal                                     | decreased   | normal    |             |           |
| 9              | F   | 50  | VT, EF 37%, GCM on EMB                                                              | normal                                     | normal      | normal    |             |           |
| 10             | M   | 47  | VT, acute HF, GCM on EMB                                                            | normal                                     | decreased   | normal    |             |           |
| 11             | M   | 39  | SCD; GCM at autopsy                                                                 | normal                                     | decreased   | decreased |             |           |
| 12             | M   | 34  | SCD; GCM at autopsy                                                                 | normal                                     | decreased   | decreased |             |           |
| 13             | F   | 73  | Acute abdominal pain, nausea/vomiting, AF; GCM on autopsy                           | normal                                     | normal      | normal    |             |           |
| 14             | M   | 64  | Rapidly progressive HF; GCM at autopsy                                              | normal                                     | decreased   | decreased |             |           |
| 15             | M   | 32  | HF; GCM on EMB                                                                      | normal                                     | decreased   | normal    | normal      | normal    |
| 16             | M   | 25  | HF; GCM on EMB                                                                      | normal                                     | decreased   | decreased | decreased   | decreased |

**Abbreviations:** HF, heart failure; AF, atrial fibrillation; GCM, giant cell myocarditis; EF, ejection fraction; CA, coronary arteries; VT, ventricular tachycardia; EMB, endomyocardial biopsy; PVC, premature ventricular complex; SCD, sudden cardiac death

**Supplemental Table 3. Lymphocytic myocarditis patients**

| Sample ID | Sex | Age | Clinical Characteristics                                                 | Junctional Immunoreactive Signal Intensity |             |           |             |           |
|-----------|-----|-----|--------------------------------------------------------------------------|--------------------------------------------|-------------|-----------|-------------|-----------|
|           |     |     |                                                                          | N-cadherin                                 | Plakoglobin | Cx43      | Desmoplakin | PKP2      |
| 1         | M   | 18  | Flu-like symptoms; LM on EMB, coxsackie B1, B3, B5                       | normal                                     | normal      | decreased | normal      | normal    |
| 2         | M   | 6   | Flu-like symptoms; LM on EMB, influenza A                                | normal                                     | normal      | decreased | decreased   | decreased |
| 3         | M   | 9   | Flu-like symptoms; LM on EMB, no viral genomes detected                  | normal                                     | decreased   | decreased | decreased   | decreased |
| 4         | F   | 18  | SCD; LM at autopsy                                                       | normal                                     | normal      | decreased | normal      | normal    |
| 5         | M   | 25  | SCD; LM at autopsy, enterovirus group B                                  | normal                                     | normal      | decreased |             |           |
| 6         | M   | 20  | SCD; LM at autopsy                                                       | normal                                     | decreased   | normal    | normal      | normal    |
| 7         | M   | 31  | Flu-like symptoms, SCD; LM at autopsy, no viral genomes detected         | normal                                     | normal      | decreased | normal      | normal    |
| 8         | M   | 24  | SCD; LM at autopsy, no viral genomes detected                            | normal                                     | normal      | normal    | normal      | normal    |
| 9         | F   | 55  | VT, EF 30%, SCD; LM at autopsy                                           | normal                                     | normal      | normal    |             |           |
| 10        | M   | 22  | Fever, HF; LM at autopsy, no viral genomes detected                      | normal                                     | decreased   | decreased |             |           |
| 11        | M   | 38  | SCD; LM at autopsy, enterovirus group B                                  | normal                                     | normal      | normal    |             |           |
| 12        | F   | 26  | SCD; LM at autopsy, no viral genomes detected                            | normal                                     | normal      | normal    |             |           |
| 13        | F   | 31  | SCD; LM at autopsy, enterovirus group B                                  | normal                                     | normal      | normal    |             |           |
| 14        | F   | 7   | SCD; LM at autopsy, no viral genomes detected                            | normal                                     | normal      | normal    |             |           |
| 15        | M   | 40  | SCD; LM at autopsy, no viral genomes detected                            | normal                                     | normal      | decreased |             |           |
| 16        | M   | 38  | VT; LM on EMB, no viral genomes detected                                 | normal                                     | normal      | normal    |             |           |
| 17        | M   | 69  | VT; LM on EMB, no viral genomes detected                                 | normal                                     | normal      | normal    |             |           |
| 18        | F   | 44  | VT, HF, AV block; LM on EMB, parvovirus B19                              | normal                                     | normal      | normal    |             |           |
| 19        | M   | 55  | VT, HF, AV block; LM on EMB, adenovirus                                  | normal                                     | normal      | normal    |             |           |
| 20        | M   | 39  | HF; LM on EMB, no viral genomes detected                                 | normal                                     | normal      | normal    |             |           |
| 21        | M   | 13  | HF; LM on EMB, no viral genomes detected                                 | normal                                     | normal      | normal    | normal      | normal    |
| 22        | M   | 39  | Flu-like symptoms, MI-like picture; LM on EMB, no viral genomes detected | normal                                     | normal      | normal    |             |           |
| 23        | F   | 10  | HF, AV block; LM on EMB, no viral genomes detected                       | normal                                     | normal      | normal    |             |           |
| 24        | M   | 20  | HF; LM on EMB, Epstein-Barr                                              | normal                                     | normal      | normal    |             |           |
| 25        | F   | 25  | HF; LM on EMB, enterovirus                                               | normal                                     | normal      | normal    |             |           |

**Abbreviations:** LM, lymphocytic myocarditis; EMB, endomyocardial biopsy; SCD, sudden cardiac death; VT, ventricular tachycardia; EF, ejection fraction; HF, heart failure; AV, atrioventricular; MI, myocardial infarction

**Supplemental Table 4. ARVC patients for immunoperoxidase studies**

| Sample ID | Sex | Age | Clinical Characteristics/ Pathological Findings                            | Desmosomal gene mutation           | Signal for IL-17 | Signal for TNF $\alpha$ |
|-----------|-----|-----|----------------------------------------------------------------------------|------------------------------------|------------------|-------------------------|
| 1         | F   | 35  | Palpitations, syncope, SCD; ARVC at autopsy                                | desmoplakin R1113X                 | increased        | increased               |
| 2         | F   | 28  | >15,000 PVCs and NSVT on Holter, SCD; ARVC at autopsy                      | desmoplakin S1015fsX1023           | increased        | increased               |
| 3         | M   | 42  | TWI V1-V3, >1000 PVCs and NSVT on Holter, RV dilatation; ARVC on EMB       | none identified                    | increased        | absent                  |
| 4         | M   | 37  | SCD; ARVC at autopsy                                                       | plakophilin2 V570fs576X            | increased        | increased               |
| 5         | M   | 20  | Syncope, NSVT, TWI, SCD; ARVC at autopsy                                   | plakophilin2 G324fsX348            | increased        | increased               |
| 6         | M   | 61  | TWI V1-V3, RV hypokinesis, SCD; ARVC at autopsy                            | none identified                    | increased        | increased               |
| 7         | F   | 40  | Pre-syncope, TWI V1-V6, WMA both ventricles, LV apex aneurysm; ARVC on EMB | desmoglein2 C591X                  | increased        | increased               |
| 8         | M   | 15  | SCD; ARVC at autopsy                                                       | desmoglein2 829_840delCTTGAAGGGATG | increased        | increased               |
| 9         | M   | 24  | Syncope, biventricular enlargement, EF 15%, VT, ICD; ARVC on EMB           | none identified                    | increased        | increased               |

**Abbreviations:** SCD, sudden cardiac death; ARVC, arrhythmogenic right ventricular cardiomyopathy; PVC, premature ventricular complex; NSVT, non-sustained ventricular tachycardia; RV, right ventricular; TWI, T wave inversions; WMA, wall motion abnormalities; LV, left ventricular; VT, ventricular tachycardia

**Supplemental Table 5. ARVC patients for blood cytokine studies**

| Patient ID | Sex | Age | Electrophysiological Abnormalities                                                  | Structural/ Functional Abnormalities                                           |
|------------|-----|-----|-------------------------------------------------------------------------------------|--------------------------------------------------------------------------------|
| 1          | M   | 60  | TWI, VT, multiple ICD shocks                                                        | Marked RV enlargement                                                          |
| 2          | F   | 60  | TWI, VT, no ICD shocks                                                              | Not available                                                                  |
| 3          | M   | 45  | TWI V1-V4, VT, multiple ICD shocks                                                  | RV EF 20%, mild RV dilatation                                                  |
| 4          | F   | 26  | TWI V1-V6, VT, multiple ICD shocks                                                  | Mild RV dilatation and basal dyskinesia                                        |
| 5          | M   | 52  | TWI V1-V4, VT, multiple ICD shocks                                                  | RV EF 40%, mild RV dilatation                                                  |
| 6          | F   | 57  | TWI, VT                                                                             | Dilated hypokinetic RV                                                         |
| 7          | F   | 31  | TWI V1-V3, VT, multiple ICD shocks                                                  | Borderline RV dilatation, normal RV function                                   |
| 8          | F   | 49  | TWI V1-V3, VT, multiple ICD shocks                                                  | RV aneurysms                                                                   |
| 9          | F   | 40  | TWI V1-V4, VT, no ICD shocks                                                        | Moderate RV enlargement and basal hypokinesia                                  |
| 10         | F   | 44  | TWI V1-V4, >4500 PVCs on Holter                                                     | Borderline RV dilatation                                                       |
| 11         | M   | 36  | TWI V1-V5, VT, multiple ICD shocks                                                  | Mild RV dilatation, focal RV dyskinesia, RV EF 38%                             |
| 12         | F   | 31  | TWI V1 only, no PVCs on Holter, no ICD shocks                                       | Normal RV dimensions                                                           |
| 13         | M   | 50  | TWI V1 only, 1473 PVCs on Holter, no ICD shocks                                     | Global RV hypokinesia, focal RV outpouchings                                   |
| 14         | M   | 45  | TWI V1-V5, VT, multiple ICD shocks                                                  | Severe RV enlargement and dysfunction                                          |
| 15         | M   | 18  | TWI V1-V3, inducible NS VT, no ICD shocks                                           | LV enlargement and mild dysfunction                                            |
| 16         | F   | 65  | TWI V2-V6, NS VT on Holter, no ICD shocks                                           | LGE of LV, normal RV                                                           |
| 17         | M   | 42  | TWI V1-V6 II and AVF, NS VT, multiple ICD shocks                                    | Mild LV and RV dilatation, LV EF 47%                                           |
| 18         | F   | 28  | TWI V4-V6, biphasic T waves V1-V3, >6000 PVCs on Holter, NS VT, multiple ICD shocks | Mild biventricular enlargement, posterior and apical LV WMA, LGE in most of RV |

**Abbreviations:** TWI, T wave inversions; VT, ventricular tachycardia; ICD, internal cardiac defibrillator; RV, right ventricular; EF, ejection fraction; PVC, premature ventricular complex; NS VT, non-sustained ventricular tachycardia; LGE, late gadolinium enhancement on magnetic resonance imaging; WMA, wall motion abnormality
